# Supplementary material for: Multiphasic strain differentiation of atypical mycobacteria from elephant trunk wash
Source: PeerJ. 2015 Nov 10;3:e1367. doi: 10.7717/peerj.1367 (PMC4647574; doi:10.7717/peerj.1367)
Supplement: Table S1 — pos, positive; neg, negative; nd, not done; ±, weak positive [file peerj-03-1367-s001.xlsx]

## Sheet: Supplementary Table 1
Supplementary Table 1. Results of conventional and API tests for two NTM strains and M. tuberculosis H37Ra control
Test	M tuberculosis H37RA	UM_11	UM_3
Growth on MacConkey agar	NG	NG	NG
LJ 5% NaCl	NG	NG	NG
LJ iron uptake	neg	neg	neg
Niacin production	pos	neg	neg
Urease	pos	neg	neg
Growth at 22oC on LJ	nd	pos	pos
Growth at 45oC on LJ	nd	NG	NG
Oxidase	neg	neg	neg
Pigment production	non-chromogenic	scotochromogenic	scotochromogenic
68°C catalase test	neg	pos	pos
Semi-quantitative catalase	low pos	high pos	high pos
Streptomycin (2mg/l)	growth	growth	growth
Hydroxylamine (500mg/l)	NG	NG	NG
Arylsulphatase 3 day test	neg	neg	neg
Arylsulphatase 14 day test	neg	+/-	+/-
API 20 NE
NO3	pos(48 hrs)	neg	neg
TRP	neg	neg	neg
GLU	neg	neg	pos(72 hrs)
ADH	neg	neg	neg
UREA	pos	neg	neg
ESC	neg	neg	neg
GEL	neg	pos(9 days)	pos(8 days)
PNPG	neg	neg	neg
GLU	neg	neg	pos(72 hrs)
ARA	neg	neg	neg
MNE	neg	neg	neg
MAN	neg	neg	neg
NAG	neg	pos(10 days)	neg
MAL	neg	neg	neg
GNT	neg	pos(10 days)	pos(8 days)
CAP	neg	neg	neg
ADI	neg	pos(10 days)	pos(8 days)
MLT	neg	neg	neg
CIT	neg	neg	neg
PAC	neg	neg	neg
API Coryne
NIT	pos(48 hrs)	neg	neg
PYZ	pos(48 hrs)	neg	neg
PYRA	neg	neg	neg
PAL	pos(48 hrs)	neg	neg
beta GUR	neg	neg	neg
beta GAL	neg	neg	neg
alpha GLU	neg	neg	neg
beta NAG	neg	neg	neg
ESC	neg	neg	neg
URE	pos(48 hrs)	neg	neg
GEL	pos(3 days)	neg	pos(6 days)
GLU	pos	neg	neg
RIB	neg	pos(7 days)	pos(6 days)
XYL	pos	neg	neg
MAN	neg	neg	neg
MAL	neg	neg	pos(6 days)
LAC	neg	neg	pos(6 days)
SAC	neg	neg	pos(6 days)
GLYG	neg	neg	neg
API ZYM
Alk phosphatase	pos (24 hrs)	neg	neg
Esterase	pos (24 hrs)	pos(24 hrs)	pos(24 hrs)
Esterase lipase	pos (24 hrs)	pos(24 hrs)	pos(24 hrs)
Lipase	pos (24 hrs)	pos(24 hrs)	pos(24 hrs)
Leucine aryamidase	pos (24 hrs)	pos(24 hrs)	pos(24 hrs)
Valine arylamidase	neg	neg	neg
Cystine arylamidase	pos (24 hrs)	neg	neg
Trypsin	neg	neg	neg
alpha-chymotrypsin	neg	neg	neg
Acid phosphatase	pos (24 hrs)	pos (24 hrs)	pos (24 hrs)
Naphthol-AS-BI-phosphohydrolase	pos (24 hrs)	pos (24 hrs)	pos (24 hrs)
alpha galactosidase	neg	neg	neg
beta galactosidase	neg	neg	neg
beta glucuronidase	neg	neg	neg
alpha glucosidase	neg	neg	neg
beta glucosidase	pos (24 hrs)	neg	neg
N-acetyl-beta-glucosaminidase	neg	neg	neg
alpha mannosidase	neg	neg	neg
alpha-fucosidase	neg	neg	neg
API 50 CH
GLY	nd	neg	neg
ERY	nd	neg	neg
DARA	nd	neg	neg
LARA	nd	neg	neg
RIB	nd	neg	neg
DXYL	nd	neg	neg
LXYL	nd	neg	neg
ADO	nd	neg	neg
MDX	nd	neg	neg
GLU	nd	neg	neg
FRU	nd	neg	neg
MNE	nd	neg	neg
SBE	nd	neg	neg
RHA	nd	neg	neg
DUL	nd	neg	neg
INO	nd	neg	neg
MAN	nd	neg	neg
SOR	nd	neg	neg
MDM	nd	neg	neg
MDG	nd	neg	neg
NAG	nd	neg	neg
AMY	nd	neg	neg
ARB	nd	neg	neg
ESC	nd	neg	neg
SAL	nd	neg	neg
CEL	nd	neg	neg
MAL	nd	neg	neg
LAC	nd	neg	neg
MEL	nd	neg	neg
SAC	nd	neg	neg
TRE	nd	neg	neg
INU	nd	neg	neg
MLZ	nd	neg	neg
RAF	nd	neg	neg
AMD	nd	pos(4 days)	neg
GLYG	nd	neg	neg
XLT	nd	neg	neg
GEN	nd	neg	neg
TUR	nd	neg	neg
LYX	nd	neg	neg
TAG	nd	neg	neg
DFUC	nd	neg	neg
Lfuc	nd	neg	neg
DARL	nd	neg	neg
LARL	nd	neg	neg
GNT	nd	neg	neg
2KG	nd	neg	neg
5KG	nd	neg	pos(5 days)
pos, positive; neg, negative; nd, not done;+/-, weak positive
